# Supplementary material for: Polymorphism in 1-methylhydantoin: investigation by periodic DFT calculations and characterization of the third polymorph
Source: Royal Society of Chemistry journal article supplement (doi:10.1039/d0ce01016b), 2020-01-01
Supplement: d0ce01016b1.pdf [file d0ce01016b1.pdf]

## Polymorphism in 1-Methylhydantoin: Investigation by Periodic DFT Calculations and Characterization of the Third Polymorph

Bernardo A. Nogueira,<sup>1,2,\*</sup> Alberto Milani,<sup>2</sup> Gulce O. Ildiz,<sup>1,3</sup>  
José A. Paixão,<sup>4</sup> Chiara Castiglioni<sup>2</sup> and Rui Fausto<sup>1</sup>

<sup>1</sup> *CQC, Department of Chemistry, University of Coimbra, P-3004-535 Coimbra, Portugal.*

<sup>2</sup> *CMIC, Dipartimento di Chimica, Materiali e Ingegneria Chimica "G. Natta", Politecnico di Milano, 20133, Milano, Italy.*

<sup>3</sup> *Department of Physics, Faculty of Sciences and Letters, Istanbul Kultur University, 34158 Istanbul, Turkey*

<sup>4</sup> *CFisUC, Department of Physics, University of Coimbra, P-3004-516, Coimbra, Portugal*

### Supporting Information

#### Index:

|                                                                                                            |   |
|------------------------------------------------------------------------------------------------------------|---|
| <b>Table S1</b> – $C_6$ and $R_{vdW}$ parameters used for the Grimme correction.....                       | 2 |
| <b>Table S2</b> – Experimental and calculated geometrical parameters for polymorph <b>I</b> of 1-MH.....   | 3 |
| <b>Table S3</b> – Experimental and calculated geometrical parameters for polymorph <b>II</b> of 1-MH.....  | 4 |
| <b>Table S4</b> – Experimental and calculated geometrical parameters for polymorph <b>III</b> of 1-MH..... | 5 |
| <b>X-Ray Crystallographic Experimental Details and Tables</b> .....                                        | 7 |

\* Corresponding author e-mail: [ban@qui.uc.pt](mailto:ban@qui.uc.pt)

**Table S1** –  $C_6$  and  $R_{vdW}$  parameters used for the Grimme correction.<sup>a</sup>

| Atom | $C_6^{28}$ (J nm <sup>6</sup> mol <sup>-1</sup> ) | $R_{vdW}$ (Å)         |
|------|---------------------------------------------------|-----------------------|
| H    | 0.14                                              | 1.3013 <sup>31</sup>  |
| C    | 1.75                                              | 1.70 <sup>31,32</sup> |
| N    | 1.23                                              | 1.55 <sup>31,32</sup> |
| O    | 0.70                                              | 1.52 <sup>31,32</sup> |

<sup>a</sup> A cutoff distance of 25.0 Å was used to truncate direct lattice summation; Standard values of  $d = 20$  and  $s_6 = 1.00$  were used.<sup>30</sup>

**Table S2** – Values of experimental (Exp.) and DFT-D(B3LYP)/6-31G(d,p) calculated (Calc) bond lengths, bond angles and torsion angles of polymorph **I** of 1-MH.

| Bond length/ Å   |        |        |            | Bond angle/ ° |       |       |           |
|------------------|--------|--------|------------|---------------|-------|-------|-----------|
|                  | Exp.   | Calc   | Calc.-Exp. |               | Exp.  | Calc  | Calc-Exp. |
| N1-C2            | 1.33   | 1.35   | 0.02       | C2-N1-C5      | 111.3 | 111.2 | -0.1      |
| N1-C5            | 1.45   | 1.45   | 0.00       | C2-N1-C6      | 123.5 | 123.3 | -0.2      |
| N1-C6            | 1.44   | 1.45   | 0.01       | C5-N1-C6      | 124.0 | 123.7 | -0.3      |
| C2=O7            | 1.23   | 1.24   | 0.01       | C2-N3-C4      | 111.9 | 111.8 | -0.1      |
| C2-N3            | 1.39   | 1.4    | 0.01       | O7=C2-N1      | 127.5 | 127.3 | -0.2      |
| N3-C4            | 1.36   | 1.37   | 0.01       | O7=C2-N3      | 124.6 | 124.6 | 0.0       |
| N3-H8            | 0.93   | 1.03   | 0.10       | N1-C2-N3      | 107.9 | 108.1 | 0.2       |
| C4=O9            | 1.21   | 1.22   | 0.01       | C2-N3-H8      | 121.7 | 123.2 | 1.5       |
| C4-C5            | 1.50   | 1.52   | 0.02       | C4-N3-H8      | 126.3 | 124.9 | -1.4      |
| C5-H10           | 0.97   | 1.09   | 0.12       | O9=C4-N3      | 126.3 | 126.2 | -0.1      |
| C5-H11           | 1.04   | 1.09   | 0.05       | O9=C4-C5      | 127.7 | 127.8 | 0.1       |
| C6-H12           | 0.96   | 1.09   | 0.13       | N3-C4-C5      | 106.0 | 106.0 | 0.0       |
| C6-H13           | 0.98   | 1.09   | 0.11       | N1-C5-C4      | 102.8 | 102.7 | -0.1      |
| C6-H14           | 0.90   | 1.09   | 0.19       | N1-C5-H10     | 110.6 | 113.3 | 2.7       |
|                  |        |        |            | N1-C5-H11     | 113.1 | 111.8 | -1.3      |
| Torsion Angle/ ° |        |        |            | C4-C5-H10     | 111.5 | 110.3 | -1.2      |
|                  |        |        |            | C4-C5-H11     | 112.0 | 110.8 | -1.2      |
| C5-N1-C2=O7      | -177.7 | -176.8 | 0.9        | H10-C5-H11    | 107.0 | 108.0 | 1.0       |
| C6-N1-C2=O7      | -9.7   | -11.3  | -1.6       | N1-C6-H12     | 110.0 | 111.0 | 1.0       |
| C2-N1-C5-C4      | -3.2   | -2.6   | 0.6        | N1-C6-H13     | 103.6 | 108.9 | 5.3       |
| C4-N3-C2=O7      | 178.7  | 176.9  | -1.8       | N1-C6-H14     | 107.0 | 109.2 | 2.2       |
| C2-N3-C4=O9      | 180.0  | 178.1  | -1.9       | H12-C6-H14    | 114.0 | 109.6 | -4.4      |
| O9=C4-C5-N1      | -177.9 | -179.5 | -1.6       | H12-C6-H13    | 105.2 | 108.2 | 3.0       |
| C5-N1-C2-N3      | 3.6    | 4.0    | 0.4        | H14-C6-H13    | 116.5 | 110.0 | -6.5      |
| C6-N1-C2-N3      | 171.6  | 169.4  | -2.2       |               |       |       |           |
| C6-N1-C5-C4      | -171.1 | -168.0 | 3.1        |               |       |       |           |
| C4-N3-C2-N1      | -2.5   | -3.8   | -1.3       |               |       |       |           |
| C2-N3-C4-C5      | 0.4    | 2.1    | 1.7        |               |       |       |           |
| N3-C4-C5-N1      | 1.6    | 0.3    | -1.3       |               |       |       |           |

**Table S3** – Values of experimental (Exp.) and DFT-D(B3LYP)/6-31G(d,p) calculated (Calc) bond lengths, bond angles and torsion angles of polymorph **II** of 1-MH.

| Bond length/ Å   |        |        |            | Bond angle/ ° |       |       |            |
|------------------|--------|--------|------------|---------------|-------|-------|------------|
|                  | Exp.   | Calc.  | Calc.-Exp. |               | Exp.  | Calc. | Calc.-Exp. |
| N1-C2            | 1.34   | 1.36   | 0.02       | C2-N1-C5      | 111.8 | 111.1 | -0.7       |
| N1-C5            | 1.44   | 1.46   | 0.02       | C2-N1-C6      | 123.6 | 124.9 | 1.3        |
| N1-C6            | 1.45   | 1.45   | 0.00       | C5-N1-C6      | 123.7 | 123.0 | -0.7       |
| C2=O7            | 1.22   | 1.23   | 0.01       | C2-N3-C4      | 112.2 | 112.0 | -0.2       |
| C2-N3            | 1.39   | 1.40   | 0.01       | O7=C2-N1      | 128.4 | 128.6 | 0.2        |
| N3-C4            | 1.36   | 1.37   | 0.01       | O7=C2-N3      | 124.3 | 123.7 | -0.6       |
| N3-H8            | 0.81   | 1.03   | 0.22       | N1-C2-N3      | 107.2 | 107.7 | 0.5        |
| C4=O9            | 1.21   | 1.23   | 0.02       | C2-N3-H8      | 120.4 | 122.4 | 2.0        |
| C4-C5            | 1.50   | 1.52   | 0.02       | C4-N3-H8      | 126.7 | 125.4 | -1.3       |
| C5-H10           | 0.99   | 1.09   | 0.10       | O9=C4-N3      | 127.1 | 126.8 | -0.3       |
| C5-H11           | 0.96   | 1.09   | 0.13       | O9=C4-C5      | 126.9 | 126.9 | 0.0        |
| C6-H12           | 1.01   | 1.09   | 0.08       | N3-C4-C5      | 106.1 | 106.2 | 0.1        |
| C6-H13           | 0.96   | 1.09   | 0.13       | N1-C5-C4      | 102.7 | 102.9 | 0.2        |
| C6-H14           | 0.95   | 1.09   | 0.14       | N1-C5-H10     | 114.5 | 111.9 | -2.6       |
|                  |        |        |            | N1-C5-H11     | 114.2 | 113.1 | -1.1       |
| Torsion Angle/ ° |        |        |            | C4-C5-H10     | 111.5 | 109.8 | -1.7       |
|                  |        |        |            | C4-C5-H11     | 110.1 | 111.6 | 1.5        |
| C5-N1-C2=O7      | -179.3 | -179.5 | -0.2       | H10-C5-H11    | 105.6 | 107.1 | 1.5        |
| C6-N1-C2=O7      | -10.3  | -11.5  | -1.2       | N1-C6-H12     | 109.6 | 109.7 | 0.1        |
| C2-N1-C5-C4      | -0.1   | -0.8   | -0.7       | N1-C6-H13     | 111.0 | 110.0 | -1.0       |
| C4-N3-C2=O7      | 178.1  | 178.8  | 0.7        | N1-C6-H14     | 114.5 | 110.9 | -3.6       |
| C2-N3-C4=O9      | -177.4 | -177.3 | 0.1        | H12-C6-H14    | 105.0 | 108.4 | 3.4        |
| O9=C4-C5-N1      | 178.5  | 177.9  | -0.6       | H12-C6-H13    | 105.0 | 108.9 | 3.9        |
| C5-N1-C2-N3      | 1.7    | 0.8    | -0.9       | H14-C6-H13    | 111.0 | 108.9 | -2.1       |
| C6-N1-C2-N3      | 170.7  | 169.7  | -1.0       |               |       |       |            |
| C6-N1-C5-C4      | -169.1 | -168.3 | 0.8        |               |       |       |            |
| C4-N3-C2-N1      | -2.8   | -2.3   | 0.5        |               |       |       |            |
| C2-N3-C4-C5      | 2.7    | 2.8    | 0.1        |               |       |       |            |
| N3-C4-C5-N1      | -1.5   | -2.1   | -0.6       |               |       |       |            |

**Table S4** – Values of experimental (Exp.) and DFT-D(B3LYP)/6-31G(d,p) calculated (Calc) bond lengths, bond angles and torsion angles of polymorph **III** of 1-MH.

| MOLECULE A       |        |        |            |               |       |       |            |
|------------------|--------|--------|------------|---------------|-------|-------|------------|
| Bond length/ Å   |        |        |            | Bond angle/ ° |       |       |            |
|                  | Exp.   | Calc.  | Calc.-Exp. |               | Exp.  | Calc. | Calc.-Exp. |
| N1-C2            | 1.33   | 1.35   | 0.02       | C2-N1-C5      | 111.7 | 111.1 | -0.6       |
| N1-C5            | 1.45   | 1.46   | 0.01       | C2-N1-C6      | 125.2 | 125.8 | 0.6        |
| N1-C6            | 1.45   | 1.45   | 0.00       | C5-N1-C6      | 123.0 | 122.8 | -0.2       |
| C2=O7            | 1.22   | 1.24   | 0.02       | C2-N3-C4      | 111.4 | 111.8 | 0.4        |
| C2-N3            | 1.40   | 1.40   | 0.00       | O7=C2-N1      | 128.8 | 128.4 | -0.4       |
| N3-C4            | 1.35   | 1.37   | 0.02       | O7=C2-N3      | 123.4 | 123.7 | 0.3        |
| N3-H8            | 0.86   | 1.03   | 0.17       | N1-C2-N3      | 107.7 | 107.9 | 0.2        |
| C4=O9            | 1.21   | 1.22   | 0.01       | C2-N3-H8      | 124.3 | 122.9 | -1.4       |
| C4-C5            | 1.50   | 1.52   | 0.02       | C4-N3-H8      | 124.3 | 124.5 | 0.2        |
| C5-H10           | 0.97   | 1.10   | 0.13       | O9=C4-N3      | 126.5 | 126.7 | 0.2        |
| C5-H11           | 0.97   | 1.09   | 0.12       | O9=C4-C5      | 126.9 | 127.3 | 0.4        |
| C6-H12           | 0.96   | 1.09   | 0.13       | N3-C4-C5      | 106.6 | 106.0 | -0.6       |
| C6-H13           | 0.96   | 1.09   | 0.13       | N1-C5-C4      | 102.4 | 102.6 | 0.2        |
| C6-H14           | 0.96   | 1.09   | 0.13       | N1-C5-H10     | 111.3 | 111.2 | -0.1       |
|                  |        |        |            | N1-C5-H11     | 111.3 | 113.0 | 1.7        |
| Torsion Angle/ ° |        |        |            | C4-C5-H10     | 111.3 | 110.3 | -1.0       |
|                  |        |        |            | C4-C5-H11     | 111.3 | 111.8 | 0.5        |
| C5-N1-C2=O7      | -177.9 | -177.2 | 0.7        | H10-C5-H11    | 109.2 | 107.8 | -1.4       |
| C6-N1-C2=O7      | -1.5   | -3.2   | -1.7       | N1-C6-H12     | 109.5 | 110.2 | 0.7        |
| C2-N1-C5-C4      | -3.6   | -6.1   | -2.5       | N1-C6-H13     | 109.5 | 109.5 | 0.0        |
| C4-N3-C2=O7      | -178.9 | -177.5 | 1.4        | N1-C6-H14     | 109.5 | 110.7 | 1.2        |
| C2-N3-C4=O9      | 175.8  | 173.4  | -2.4       | H12-C6-H14    | 109.5 | 108.2 | -1.3       |
| O9=C4-C5-N1      | -175.4 | -172.6 | 2.8        | H12-C6-H13    | 109.5 | 109.1 | -0.4       |
| C5-N1-C2-N3      | 1.4    | 2.5    | 1.1        | H14-C6-H13    | 109.5 | 109.2 | -0.3       |
| C6-N1-C2-N3      | 177.8  | 176.5  | -1.3       |               |       |       |            |
| C6-N1-C5-C4      | 179.9  | 179.6  | -0.3       |               |       |       |            |
| C4-N3-C2-N1      | 1.8    | 2.8    | 1.0        |               |       |       |            |
| C2-N3-C4-C5      | -4.0   | -7.0   | -3.0       |               |       |       |            |
| N3-C4-C5-N1      | 4.5    | 7.5    | 3.0        |               |       |       |            |
| MOLECULE B       |        |        |            |               |       |       |            |
| Bond length/ Å   |        |        |            | Bond angle/ ° |       |       |            |
|                  | Exp.   | Calc.  | Calc.-Exp. |               | Exp.  | Calc. | Calc.-Exp. |
| N1-C2            | 1.33   | 1.35   | 0.02       | C2-N1-C5      | 111.8 | 111.2 | -0.6       |
| N1-C5            | 1.45   | 1.46   | 0.01       | C2-N1-C6      | 125.5 | 126.4 | 0.9        |
| N1-C6            | 1.45   | 1.45   | 0.00       | C5-N1-C6      | 122.7 | 122.4 | -0.3       |
| C2=O7            | 1.22   | 1.24   | 0.02       | C2-N3-C4      | 112.6 | 112.1 | -0.5       |
| C2-N3            | 1.39   | 1.40   | 0.01       | O7=C2-N1      | 128.4 | 128.6 | 0.2        |
| N3-C4            | 1.36   | 1.37   | 0.01       | O7=C2-N3      | 124.2 | 123.5 | -0.7       |
| N3-H8            | 0.86   | 1.03   | 0.17       | N1-C2-N3      | 107.4 | 107.9 | 0.5        |
| C4=O9            | 1.21   | 1.22   | 0.01       | C2-N3-H8      | 123.7 | 122.1 | -1.6       |
| C4-C5            | 1.52   | 1.52   | 0.00       | C4-N3-H8      | 123.7 | 125.8 | 2.1        |
| C5-H10           | 0.97   | 1.09   | 0.12       | O9=C4-N3      | 127.1 | 127.0 | -0.1       |
| C5-H11           | 0.97   | 1.09   | 0.12       | O9=C4-C5      | 127.3 | 127.3 | 0.0        |
| C6-H12           | 0.96   | 1.09   | 0.13       | N3-C4-C5      | 105.6 | 105.7 | 0.1        |
| C6-H13           | 0.96   | 1.09   | 0.13       | N1-C5-C4      | 102.6 | 103.0 | 0.4        |
| C6-H14           | 0.96   | 1.09   | 0.13       | N1-C5-H10     | 111.3 | 112.2 | 0.9        |
|                  |        |        |            | N1-C5-H11     | 111.3 | 111.4 | 0.1        |
|                  |        |        |            | C4-C5-H10     | 111.2 | 110.8 | -0.4       |

|                  |        |        |      |            |       |       |      |
|------------------|--------|--------|------|------------|-------|-------|------|
| Torsion Angle/ ° |        |        |      | C4-C5-H11  | 111.2 | 111.0 | -0.2 |
|                  |        |        |      | H10-C5-H11 | 109.2 | 108.4 | -0.8 |
| C5-N1-C2=O7      | 179.6  | 178.7  | -0.9 | N1-C6-H12  | 109.5 | 110.9 | 1.4  |
| C6-N1-C2=O7      | -2.8   | -2.1   | 0.7  | N1-C6-H13  | 109.4 | 110.2 | 0.8  |
| C2-N1-C5-C4      | 0.4    | 1.9    | 1.5  | N1-C6-H14  | 109.5 | 109.9 | 0.4  |
| C4-N3-C2=O7      | -179.1 | -179.8 | -0.7 | H12-C6-H14 | 109.5 | 108.5 | -1.0 |
| C2-N3-C4=O9      | 179.3  | 180.0  | 0.7  | H12-C6-H13 | 109.5 | 108.2 | -1.3 |
| O9=C4-C5-N1      | 179.4  | 179.2  | -0.2 | H14-C6-H13 | 109.5 | 109.1 | -0.4 |
| C5-N1-C2-N3      | 0.0    | -1.5   | -1.5 |            |       |       |      |
| C6-N1-C2-N3      | 176.7  | 177.7  | 1.0  |            |       |       |      |
| C6-N1-C5-C4      | -176.4 | -177.3 | -0.9 |            |       |       |      |
| C4-N3-C2-N1      | 0.5    | 0.5    | 0.0  |            |       |       |      |
| C2-N3-C4-C5      | 0.7    | 0.7    | 0.0  |            |       |       |      |
| N3-C4-C5-N1      | -0.7   | -1.5   | -0.8 |            |       |       |      |

### MOLECULE C

|                  |        |        |       |               |       |       |      |
|------------------|--------|--------|-------|---------------|-------|-------|------|
| Bond length/ Å   |        |        |       | Bond angle/ ° |       |       |      |
| N1-C2            | 1.34   | 1.35   | 0.01  | C2-N1-C5      | 111.4 | 111.1 | -0.3 |
| N1-C5            | 1.48   | 1.46   | -0.02 | C2-N1-C6      | 124.9 | 125.5 | 0.6  |
| N1-C6            | 1.48   | 1.46   | -0.02 | C5-N1-C6      | 123.4 | 123.3 | -0.1 |
| C2=O7            | 1.22   | 1.24   | 0.02  | C2-N3-C4      | 112.5 | 112.2 | -0.3 |
| C2-N3            | 1.39   | 1.40   | 0.01  | O7=C2-N1      | 128.2 | 128.6 | 0.4  |
| N3-C4            | 1.35   | 1.37   | 0.02  | O7=C2-N3      | 124.3 | 123.7 | -0.6 |
| N3-H8            | 0.86   | 1.03   | 0.17  | N1-C2-N3      | 107.6 | 107.8 | 0.2  |
| C4=O9            | 1.20   | 1.22   | 0.02  | C2-N3-H8      | 123.7 | 122.6 | -1.1 |
| C4-C5            | 1.52   | 1.52   | 0.00  | C4-N3-H8      | 123.7 | 125.1 | 1.4  |
| C5-H10           | 0.97   | 1.10   | 0.13  | O9=C4-N3      | 127.5 | 128.8 | 1.3  |
| C5-H11           | 0.97   | 1.10   | 0.13  | O9=C4-C5      | 126.9 | 127.3 | 0.4  |
| C6-H12           | 0.96   | 1.09   | 0.13  | N3-C4-C5      | 105.6 | 105.9 | 0.3  |
| C6-H13           | 0.96   | 1.09   | 0.13  | N1-C5-C4      | 102.7 | 102.8 | 0.1  |
| C6-H14           | 0.96   | 1.09   | 0.13  | N1-C5-H10     | 111.2 | 112.0 | 0.8  |
|                  |        |        |       | N1-C5-H11     | 111.2 | 112.0 | 0.8  |
| Torsion Angle/ ° |        |        |       | C4-C5-H10     | 111.2 | 111.2 | 0.0  |
|                  |        |        |       | C4-C5-H11     | 111.2 | 109.7 | -1.5 |
| C5-N1-C2=O7      | 175.8  | 176.9  | 1.1   | H10-C5-H11    | 109.2 | 107.3 | -1.9 |
| C6-N1-C2=O7      | 1.9    | 1.6    | -0.3  | N1-C6-H12     | 109.4 | 110.7 | 1.3  |
| C2-N1-C5-C4      | 4.5    | 4.5    | 0.0   | N1-C6-H13     | 109.5 | 109.7 | 0.2  |
| C4-N3-C2=O7      | 178.9  | 179.7  | 0.8   | N1-C6-H14     | 109.4 | 110.5 | 1.1  |
| C2-N3-C4=O9      | -177.6 | -176.8 | 0.8   | H12-C6-H14    | 109.5 | 108.9 | -0.6 |
| O9=C4-C5-N1      | 176.2  | 175.6  | -0.6  | H12-C6-H13    | 109.5 | 108.8 | -0.7 |
| C5-N1-C2-N3      | -2.9   | -2.6   | 0.3   | H14-C6-H13    | 109.5 | 108.1 | -1.4 |
| C6-N1-C2-N3      | -176.9 | -177.9 | -1.0  |               |       |       |      |
| C6-N1-C5-C4      | 178.5  | 180.0  | 1.5   |               |       |       |      |
| C4-N3-C2-N1      | -0.1   | -0.7   | -0.6  |               |       |       |      |
| C2-N3-C4-C5      | 2.9    | 3.5    | 0.6   |               |       |       |      |
| N3-C4-C5-N1      | -4.3   | -4.7   | -0.4  |               |       |       |      |

## Single crystal X-Ray Crystallography

### Data collection and structure refinement details

Data were collected at room temperature on an X-ray single crystal diffractometer equipped with a kappa-geometry goniometer, a 4K CCD detector (Bruker APEXII) and a sealed, fine focus, X-ray tube, emitting MoK $\alpha$  radiation ( $\lambda = 0.71073 \text{ \AA}$ ). The *bremsstrahlung* radiation and the K $\beta$  component were filtered by a graphite monochromator. Data collection and data reduction were performed using the Bruker APEXIII software package [1]. The measurements were performed on a small single crystal coated with perfluorinated ether oil mounted on top of a thin glass fiber. Initial lattice parameters were determined from a preliminary data collection consisting of set of 36 detector frames. A subsequent data collection was performed on a full sphere, using omega and phi scans of 0.5° width. The data acquisition time was 10 s per frame. Reflections were merged and corrected for Lorentz and polarization effects, scan speed, and background using SAINT V8.38A [2] included in the APEXIII package. Absorption corrections, including odd and even spherical harmonics up to rank 3 and 6, respectively, were performed using SADABS-2016/2[3].

Space group assignment was based upon systematic absences, *E* statistics, and successful refinement of the structure in space group  $P2_12_12_1$ . The structure was solved by a dual-space method using SHELXT 2014/5 [4] and refined by full matrix least-squares (minimizing  $\sum w(F_o^2 - F_c^2)^2$ ) using SHELXL-2018/3 [5]. The weighting scheme was  $w=1/[s^2(F_o^2)+(0.0437P)^2+0.1746P]$

where  $P=(F_o^2+2F_c^2)/3$ , where  $P=(F_o^2+2F_c^2)/3$ , as suggested by SHELXL-2018/3. The final quality factors of the refinement were  $R_1(I>2\sigma) = 0.0371$ ,  $wR_{\text{all}} = 0.0928$  and  $\text{GOF} = 1.045$  for 3888 independent reflections and 229 refined parameters. Default SHELXL-2018/3 values for atomic scattering factors for all atoms and anomalous dispersion corrections for the non-hydrogen atoms were used. All atoms were refined anisotropically with exception for the H atoms. The H atoms attached to the C atoms were initially placed idealized positions and refined as riding using SHELXL defaults. Those attached to the N atoms had their positions freely refined with an isotropic displacement parameter constrained to 1.2X Uiso of the parent atom. The ORTEP plot of the molecule was generated by PLATON [6] and the drawing of the crystal structure by Mercury [7].

CCDC 2010673 contains additional crystallographic data for this paper. These data are provided free of charge by The Cambridge Crystallographic Data Centre. Standard crystallographic tables generated from the CIF by the Supplementary Material option of PLATON [6] are given below.

[1] Bruker (2016). *APEX3*, Bruker AXS Inc., Madison, Wisconsin, USA.

[2] Bruker (2016). *SAINT V8.38A*, Bruker AXS Inc., Madison, Wisconsin, USA.

[3] Krause, L., Herbst-Irmer, R., Sheldrick, G. M. & Stalke, D. (2015). *J. Appl. Cryst.* **48**, 3–10.

[4] Sheldrick, G. M. (2015*a*). *Acta Cryst.* **A71**, 3–8

[5] Sheldrick, G. M. (2015*b*). *Acta Cryst.* **C71**, 3–8.

[6] Spek, A. L. (2009). *Acta Cryst.* **D65**, 148–155.

[7] C. F. Macrae, I. Sovago, S. J. Cottrell, P. T. A. Galek, P. McCabe, E. Pidcock, M. Platings, G. P. Shields, J. S. Stevens, M. Towler and P. A. Wood, *J. Appl. Cryst.*, **53**, 226-235, 2020



=====  
C r y s t a l l o g r a p h i c   T a b l e s  
=====

B E L O N G I N G   T O   T H E   P A P E R

**Polymorphism in 1-Methylhydantoin: Investigation by Periodic DFT Calculations and  
Characterization of the Third Polymorph**

b y

Bernardo A. Nogueira, Alberto Milani, Gulce O. Ildiz, José A. Paixão,  
Chiara Castiglioni and Rui Fausto

C o n t e n t s  
=====

|                                                                                                            |
|------------------------------------------------------------------------------------------------------------|
| Table S4 - Crystal Data and Details of the Structure Determination                                         |
| Table S5 - Final Coordinates and Equivalent Isotropic Displacement<br>Parameters of the non-Hydrogen atoms |
| Table S6 - Hydrogen Atom Positions and Isotropic Displacement<br>Parameters                                |
| Table S7 - (An)isotropic Displacement Parameters                                                           |
| Table S8 - Bond Distances (Angstrom)                                                                       |
| Table S9 - Bond Angles (Degrees)                                                                           |
| Table S10 - Torsion Angles (Degrees)                                                                       |
| Table S11 - Contact Distances (Angstrom)                                                                   |
| Table S12 - Hydrogen Bonds (Angstrom, Deg)                                                                 |

**Table S4** - Crystal Data and Details of the Structure Determination

|                    |           |               |              |
|--------------------|-----------|---------------|--------------|
| Formula            |           |               | C4 H6 N2 O2  |
| Formula Weight     |           |               | 114.11       |
| Crystal System     |           |               | orthorhombic |
| Space group        |           | P212121       | (No. 19)     |
| a, b, c [Angstrom] | 7.8466(2) | 9.8257(3)     | 20.3107(7)   |
| V [Ang**3]         |           |               | 1565.92(8)   |
| Z                  |           |               | 12           |
| D(calc) [g/cm**3]  |           |               | 1.452        |
| Mu(MoKa) [ /mm ]   |           |               | 0.118        |
| F(000)             |           |               | 720          |
| Crystal Size [mm]  |           | 0.18 x 0.18 x | 0.60         |

## Data Collection

|                                  |  |                             |           |
|----------------------------------|--|-----------------------------|-----------|
| Temperature (K)                  |  |                             | 293       |
| Radiation [Angstrom]             |  | MoKa                        | 0.71073   |
| Theta Min-Max [Deg]              |  |                             | 2.3, 28.3 |
| Dataset                          |  | -10: 10 ; -13: 13 ; -27: 27 |           |
| Tot., Uniq. Data, R(int)         |  | 45996, 3888,                | 0.040     |
| Observed Data [I > 2.0 sigma(I)] |  |                             | 2898      |

## Refinement

|                                                                |  |                 |             |
|----------------------------------------------------------------|--|-----------------|-------------|
| Nref, Npar                                                     |  |                 | 3888, 229   |
| R, wR2, S                                                      |  | 0.0371, 0.0928, | 1.04        |
| w = ^2^(FO^2^)+(0.0437P)^2^+0.1746P] WHERE P=(FO^2^+2FC^2^)/3' |  |                 |             |
| Max. and Av. Shift/Error                                       |  |                 | 0.00, 0.00  |
| Min. and Max. Resd. Dens. [e/Ang^3]                            |  |                 | -0.23, 0.16 |

**Table S5** - Final Coordinates and Equivalent Isotropic Displacement Parameters of the non-Hydrogen atoms

| Atom | x           | y            | z            | U(eq) [Ang <sup>2</sup> ] |
|------|-------------|--------------|--------------|---------------------------|
| O7A  | 0.5256 (2)  | 0.26703 (18) | 0.49530 (10) | 0.0520 (6)                |
| O9A  | 0.1379 (2)  | 0.60983 (18) | 0.47874 (11) | 0.0630 (7)                |
| N1A  | 0.5594 (2)  | 0.4987 (2)   | 0.48573 (11) | 0.0435 (7)                |
| N3A  | 0.2989 (2)  | 0.4161 (2)   | 0.48715 (10) | 0.0397 (6)                |
| C2A  | 0.4711 (3)  | 0.3828 (2)   | 0.49033 (11) | 0.0359 (7)                |
| C4A  | 0.2724 (3)  | 0.5512 (2)   | 0.48073 (13) | 0.0410 (7)                |
| C5A  | 0.4481 (3)  | 0.6142 (2)   | 0.47587 (14) | 0.0439 (8)                |
| C6A  | 0.7434 (3)  | 0.5077 (3)   | 0.48384 (15) | 0.0516 (9)                |
| O7B  | -0.0562 (2) | 0.50869 (17) | 0.31127 (11) | 0.0545 (6)                |
| O9B  | 0.3592 (2)  | 0.82506 (19) | 0.34004 (11) | 0.0648 (7)                |
| N1B  | -0.0698 (2) | 0.7385 (2)   | 0.33139 (10) | 0.0419 (6)                |
| N3B  | 0.1830 (2)  | 0.64396 (19) | 0.32064 (10) | 0.0389 (6)                |
| C2B  | 0.0072 (3)  | 0.6205 (2)   | 0.32061 (11) | 0.0377 (7)                |
| C4B  | 0.2190 (3)  | 0.7759 (2)   | 0.33337 (12) | 0.0397 (7)                |
| C5B  | 0.0514 (3)  | 0.8487 (2)   | 0.33773 (13) | 0.0416 (7)                |
| C6B  | -0.2528 (3) | 0.7590 (3)   | 0.33289 (14) | 0.0524 (9)                |
| O7C  | 0.4539 (2)  | 0.45993 (17) | 0.31755 (11) | 0.0564 (7)                |
| O9C  | 0.8466 (2)  | 0.12548 (18) | 0.34908 (11) | 0.0650 (7)                |
| N1C  | 0.4233 (2)  | 0.2309 (2)   | 0.33671 (10) | 0.0428 (6)                |
| N3C  | 0.6824 (2)  | 0.31467 (19) | 0.33074 (10) | 0.0402 (6)                |
| C2C  | 0.5097 (3)  | 0.3463 (2)   | 0.32720 (12) | 0.0376 (7)                |
| C4C  | 0.7107 (3)  | 0.1812 (2)   | 0.34296 (12) | 0.0424 (8)                |
| C5C  | 0.5358 (3)  | 0.1165 (2)   | 0.34718 (15) | 0.0467 (8)                |
| C6C  | 0.2396 (3)  | 0.2195 (3)   | 0.34020 (15) | 0.0552 (9)                |

U(eq) = 1/3 of the trace of the orthogonalized U Tensor

**Table S6** - Hydrogen Atom Positions and Isotropic Displacement Parameters

| Atom | x         | y         | z           | U(iso) [Ang <sup>2</sup> ] |
|------|-----------|-----------|-------------|----------------------------|
| ---- | ---       | ---       | ---         | -----                      |
| H8A  | 0.228 (3) | 0.358 (3) | 0.4916 (12) | 0.0480                     |
| H10A | 0.46624   | 0.65527   | 0.43301     | 0.0530                     |
| H11A | 0.46510   | 0.68254   | 0.50971     | 0.0530                     |
| H12A | 0.79147   | 0.41860   | 0.48936     | 0.0770                     |
| H13A | 0.78214   | 0.56599   | 0.51869     | 0.0770                     |
| H14A | 0.77853   | 0.54452   | 0.44223     | 0.0770                     |
| H8B  | 0.259 (3) | 0.582 (3) | 0.3174 (12) | 0.0470                     |
| H10B | 0.03897   | 0.89496   | 0.37964     | 0.0500                     |
| H11B | 0.03860   | 0.91420   | 0.30234     | 0.0500                     |
| H12B | -0.28425  | 0.82471   | 0.30009     | 0.0790                     |
| H13B | -0.28594  | 0.79154   | 0.37558     | 0.0790                     |
| H14B | -0.30938  | 0.67434   | 0.32400     | 0.0790                     |
| H8C  | 0.758 (4) | 0.375 (3) | 0.3261 (12) | 0.0480                     |
| H10C | 0.52071   | 0.04783   | 0.31335     | 0.0560                     |
| H11C | 0.51704   | 0.07548   | 0.39002     | 0.0560                     |
| H12C | 0.18909   | 0.30679   | 0.33190     | 0.0830                     |
| H13C | 0.20717   | 0.18854   | 0.38324     | 0.0830                     |
| H14C | 0.20078   | 0.15553   | 0.30777     | 0.0830                     |

=====  
The Temperature Factor has the Form of  $\text{Exp}(-T)$  Where  
 $T = 8 * (\text{Pi} ** 2) * U * (\text{Sin}(\text{Theta}) / \text{Lambda}) ** 2$  for Isotropic Atoms

**Table S7** - (An)isotropic Displacement Parameters

| Atom | U(1,1) or U | U(2,2)     | U(3,3)     | U(2,3)      | U(1,3)      | U(1,2)      |
|------|-------------|------------|------------|-------------|-------------|-------------|
| ---- | -----       | -----      | -----      | -----       | -----       | -----       |
| O7A  | 0.0369(9)   | 0.0333(10) | 0.0858(14) | 0.0034(8)   | -0.0030(8)  | 0.0054(8)   |
| O9A  | 0.0352(9)   | 0.0464(12) | 0.1075(15) | -0.0007(11) | 0.0014(10)  | 0.0116(8)   |
| N1A  | 0.0272(9)   | 0.0335(11) | 0.0698(14) | 0.0069(10)  | -0.0062(9)  | -0.0014(8)  |
| N3A  | 0.0260(9)   | 0.0312(11) | 0.0620(12) | 0.0014(9)   | -0.0003(9)  | -0.0041(8)  |
| C2A  | 0.0263(10)  | 0.0310(12) | 0.0504(13) | 0.0006(10)  | -0.0017(9)  | 0.0002(9)   |
| C4A  | 0.0318(11)  | 0.0349(13) | 0.0562(14) | -0.0013(11) | 0.0003(11)  | 0.0046(9)   |
| C5A  | 0.0333(11)  | 0.0300(13) | 0.0685(16) | 0.0036(11)  | -0.0057(11) | -0.0015(9)  |
| C6A  | 0.0266(11)  | 0.0523(16) | 0.0759(17) | 0.0056(14)  | -0.0052(11) | -0.0049(11) |
| O7B  | 0.0409(9)   | 0.0386(10) | 0.0841(13) | -0.0083(9)  | 0.0052(8)   | -0.0137(8)  |
| O9B  | 0.0335(9)   | 0.0469(11) | 0.1139(17) | 0.0003(11)  | -0.0083(10) | -0.0124(8)  |
| N1B  | 0.0267(8)   | 0.0336(11) | 0.0655(13) | 0.0020(10)  | -0.0005(8)  | 0.0004(7)   |
| N3B  | 0.0247(9)   | 0.0291(10) | 0.0629(12) | -0.0006(9)  | 0.0010(8)   | 0.0003(7)   |
| C2B  | 0.0276(10)  | 0.0355(13) | 0.0499(13) | 0.0021(10)  | 0.0021(9)   | -0.0040(9)  |
| C4B  | 0.0305(10)  | 0.0320(12) | 0.0565(14) | 0.0057(10)  | -0.0006(10) | -0.0026(9)  |
| C5B  | 0.0366(11)  | 0.0280(12) | 0.0602(15) | 0.0014(11)  | 0.0001(10)  | -0.0001(9)  |
| C6B  | 0.0271(11)  | 0.0584(16) | 0.0718(17) | -0.0002(14) | 0.0013(10)  | 0.0060(11)  |
| O7C  | 0.0392(9)   | 0.0329(9)  | 0.0971(15) | 0.0054(9)   | 0.0057(9)   | 0.0069(7)   |
| O9C  | 0.0388(10)  | 0.0479(11) | 0.1084(16) | 0.0021(11)  | -0.0013(10) | 0.0123(8)   |
| N1C  | 0.0277(9)   | 0.0350(11) | 0.0658(13) | 0.0019(10)  | -0.0025(9)  | -0.0050(8)  |
| N3C  | 0.0262(9)   | 0.0279(10) | 0.0666(13) | -0.0015(9)  | 0.0023(8)   | -0.0021(8)  |
| C2C  | 0.0295(10)  | 0.0312(12) | 0.0520(14) | -0.0034(10) | 0.0017(9)   | -0.0011(9)  |
| C4C  | 0.0344(11)  | 0.0342(13) | 0.0587(15) | -0.0044(10) | -0.0008(11) | 0.0002(9)   |
| C5C  | 0.0394(12)  | 0.0300(12) | 0.0706(17) | -0.0002(12) | 0.0000(11)  | -0.0035(10) |
| C6C  | 0.0293(12)  | 0.0636(17) | 0.0727(18) | -0.0004(14) | 0.0006(11)  | -0.0119(11) |

=====  
The Temperature Factor has the Form of  $\text{Exp}(-T)$  Where  
 $T = 8 * (\text{Pi}^{**2}) * U * (\text{Sin}(\text{Theta}) / \text{Lambda})^{**2}$  for Isotropic Atoms  
 $T = 2 * (\text{Pi}^{**2}) * \text{Sum}_{ij} (h(i) * h(j) * U(i,j) * \text{Astar}(i) * \text{Astar}(j))$ , for  
Anisotropic Atoms.  $\text{Astar}(i)$  are Reciprocal Axial Lengths and  
 $h(i)$  are the Reflection Indices.

**Table S8** - Bond Distances (Angstrom)

|     |       |          |     |       |          |
|-----|-------|----------|-----|-------|----------|
| O7A | -C2A  | 1.219(3) | N3B | -H8B  | 0.86(3)  |
| O9A | -C4A  | 1.203(3) | C4B | -C5B  | 1.500(3) |
| N1A | -C2A  | 1.336(3) | O7C | -C2C  | 1.215(3) |
| N1A | -C5A  | 1.446(3) | O9C | -C4C  | 1.205(3) |
| N1A | -C6A  | 1.447(3) | N1C | -C5C  | 1.445(3) |
| N3A | -C2A  | 1.392(3) | N1C | -C2C  | 1.335(3) |
| N3A | -C4A  | 1.350(3) | N1C | -C6C  | 1.448(3) |
| N3A | -H8A  | 0.80(3)  | N3C | -C4C  | 1.353(3) |
| C4A | -C5A  | 1.515(3) | N3C | -C2C  | 1.392(3) |
| O7B | -C2B  | 1.221(3) | C5B | -H10B | 0.9700   |
| O9B | -C4B  | 1.209(3) | C5B | -H11B | 0.9700   |
| N1B | -C5B  | 1.447(3) | C6B | -H12B | 0.9600   |
| N1B | -C2B  | 1.326(3) | C6B | -H13B | 0.9600   |
| N1B | -C6B  | 1.450(3) | C6B | -H14B | 0.9600   |
| N3B | -C4B  | 1.352(3) | N3C | -H8C  | 0.84(3)  |
| N3B | -C2B  | 1.399(3) | C4C | -C5C  | 1.515(3) |
| C5A | -H10A | 0.9700   | C5C | -H10C | 0.9700   |
| C5A | -H11A | 0.9700   | C5C | -H11C | 0.9700   |
| C6A | -H12A | 0.9600   | C6C | -H12C | 0.9600   |
| C6A | -H13A | 0.9600   | C6C | -H13C | 0.9600   |
| C6A | -H14A | 0.9600   | C6C | -H14C | 0.9600   |

**Table S9** - Bond Angles (Degrees)

|      |      |       |             |      |      |       |             |
|------|------|-------|-------------|------|------|-------|-------------|
| C2A  | -N1A | -C5A  | 111.43 (17) | O7B  | -C2B | -N1B  | 128.8 (2)   |
| C2A  | -N1A | -C6A  | 124.8 (2)   | O7B  | -C2B | -N3B  | 123.4 (2)   |
| C5A  | -N1A | -C6A  | 123.4 (2)   | N1B  | -C2B | -N3B  | 107.78 (18) |
| C2A  | -N3A | -C4A  | 112.66 (18) | C2B  | -N3B | -H8B  | 124.8 (18)  |
| O7A  | -C2A | -N1A  | 128.2 (2)   | C4B  | -N3B | -H8B  | 123.5 (18)  |
| O7A  | -C2A | -N3A  | 124.3 (2)   | O9B  | -C4B | -N3B  | 126.5 (2)   |
| N1A  | -C2A | -N3A  | 107.45 (18) | O9B  | -C4B | -C5B  | 126.92 (19) |
| C2A  | -N3A | -H8A  | 120.1 (19)  | N3B  | -C4B | -C5B  | 106.59 (18) |
| C4A  | -N3A | -H8A  | 127 (2)     | N1B  | -C5B | -C4B  | 102.37 (16) |
| O9A  | -C4A | -N3A  | 127.5 (2)   | C5C  | -N1C | -C6C  | 122.8 (2)   |
| O9A  | -C4A | -C5A  | 126.92 (19) | C2C  | -N1C | -C5C  | 111.82 (17) |
| N3A  | -C4A | -C5A  | 105.55 (18) | C2C  | -N1C | -C6C  | 125.3 (2)   |
| N1A  | -C5A | -C4A  | 102.71 (16) | C2C  | -N3C | -C4C  | 112.68 (18) |
| C5B  | -N1B | -C6B  | 123.0 (2)   | N1B  | -C5B | -H11B | 111.00      |
| C2B  | -N1B | -C5B  | 111.70 (17) | C4B  | -C5B | -H10B | 111.00      |
| C2B  | -N1B | -C6B  | 125.2 (2)   | C4B  | -C5B | -H11B | 111.00      |
| C2B  | -N3B | -C4B  | 111.36 (18) | N1B  | -C5B | -H10B | 111.00      |
| N1A  | -C5A | -H11A | 111.00      | H10B | -C5B | -H11B | 109.00      |
| C4A  | -C5A | -H10A | 111.00      | H12B | -C6B | -H14B | 109.00      |
| C4A  | -C5A | -H11A | 111.00      | H13B | -C6B | -H14B | 109.00      |
| N1A  | -C5A | -H10A | 111.00      | H12B | -C6B | -H13B | 109.00      |
| H10A | -C5A | -H11A | 109.00      | N1B  | -C6B | -H12B | 109.00      |
| H12A | -C6A | -H14A | 110.00      | N1B  | -C6B | -H13B | 109.00      |
| H13A | -C6A | -H14A | 109.00      | N1B  | -C6B | -H14B | 109.00      |
| H12A | -C6A | -H13A | 109.00      | O7C  | -C2C | -N1C  | 128.4 (2)   |
| N1A  | -C6A | -H12A | 109.00      | O7C  | -C2C | -N3C  | 124.3 (2)   |
| N1A  | -C6A | -H13A | 109.00      | N1C  | -C2C | -N3C  | 107.29 (17) |
| N1A  | -C6A | -H14A | 109.00      | C2C  | -N3C | -H8C  | 121 (2)     |

**Table S9** - Bond Angles (Degrees) (continued)

|     |      |       |            |      |      |       |        |
|-----|------|-------|------------|------|------|-------|--------|
| C4C | -N3C | -H8C  | 126(2)     | C4C  | -C5C | -H11C | 111.00 |
| O9C | -C4C | -N3C  | 127.2(2)   | H10C | -C5C | -H11C | 109.00 |
| O9C | -C4C | -C5C  | 127.24(19) | N1C  | -C6C | -H12C | 109.00 |
| N3C | -C4C | -C5C  | 105.57(18) | N1C  | -C6C | -H13C | 109.00 |
| N1C | -C5C | -C4C  | 102.63(16) | N1C  | -C6C | -H14C | 109.00 |
| N1C | -C5C | -H10C | 111.00     | H12C | -C6C | -H13C | 109.00 |
| N1C | -C5C | -H11C | 111.00     | H12C | -C6C | -H14C | 109.00 |
| C4C | -C5C | -H10C | 111.00     | H13C | -C6C | -H14C | 109.00 |



**Table S10** - Torsion Angles (Degrees)

|     |      |      |      |            |
|-----|------|------|------|------------|
| C5A | -N1A | -C2A | -O7A | 175.9 (2)  |
| C5A | -N1A | -C2A | -N3A | -2.9 (3)   |
| C6A | -N1A | -C2A | -O7A | 2.0 (4)    |
| C6A | -N1A | -C2A | -N3A | -176.9 (2) |
| C2A | -N1A | -C5A | -C4A | 4.5 (3)    |
| C6A | -N1A | -C5A | -C4A | 178.5 (2)  |
| C4A | -N3A | -C2A | -O7A | -179.0 (2) |
| C4A | -N3A | -C2A | -N1A | -0.2 (3)   |
| C2A | -N3A | -C4A | -O9A | -177.6 (3) |
| C2A | -N3A | -C4A | -C5A | 2.9 (3)    |
| O9A | -C4A | -C5A | -N1A | 176.2 (3)  |
| N3A | -C4A | -C5A | -N1A | -4.3 (3)   |
| C5B | -N1B | -C2B | -O7B | -177.9 (3) |
| C5B | -N1B | -C2B | -N3B | 1.4 (3)    |
| C6B | -N1B | -C2B | -O7B | -1.4 (4)   |
| C6B | -N1B | -C2B | -N3B | 177.8 (2)  |
| C2B | -N1B | -C5B | -C4B | -3.6 (3)   |
| C6B | -N1B | -C5B | -C4B | 179.8 (2)  |
| C4B | -N3B | -C2B | -O7B | -178.9 (2) |
| C4B | -N3B | -C2B | -N1B | 1.9 (3)    |
| C2B | -N3B | -C4B | -O9B | 175.8 (2)  |
| C2B | -N3B | -C4B | -C5B | -4.1 (3)   |
| O9B | -C4B | -C5B | -N1B | -175.3 (3) |
| N3B | -C4B | -C5B | -N1B | 4.5 (3)    |
| C5C | -N1C | -C2C | -O7C | -179.5 (3) |
| C5C | -N1C | -C2C | -N3C | 0.1 (3)    |
| C6C | -N1C | -C2C | -O7C | -2.8 (4)   |
| C6C | -N1C | -C2C | -N3C | 176.7 (2)  |

**Table S10** - Torsion Angles (Degrees) (continued)

|     |      |      |      |            |
|-----|------|------|------|------------|
| C2C | -N1C | -C5C | -C4C | 0.4 (3)    |
| C6C | -N1C | -C5C | -C4C | -176.4 (2) |
| C4C | -N3C | -C2C | -O7C | 179.0 (2)  |
| C4C | -N3C | -C2C | -N1C | -0.6 (3)   |
| C2C | -N3C | -C4C | -O9C | -179.4 (3) |
| C2C | -N3C | -C4C | -C5C | 0.8 (3)    |
| O9C | -C4C | -C5C | -N1C | 179.5 (3)  |
| N3C | -C4C | -C5C | -N1C | -0.7 (3)   |

**Table S11** - Contact Distances (Angstrom)

|     |        |           |     |         |           |
|-----|--------|-----------|-----|---------|-----------|
| O7A | .C5C   | 3.353 (3) | N3C | .C4B_u  | 3.443 (3) |
| O7A | .C6A   | 2.927 (3) | N3C | .O7B_j  | 2.828 (2) |
| O7A | .N3A_a | 2.822 (2) | O7A | .H12A_b | 2.6100    |
| O7B | .C5B_l | 3.410 (3) | O7A | .H11C   | 2.8500    |
| O7B | .N3C_k | 2.828 (2) | O7A | .H8A    | 2.50 (2)  |
| O7B | .C6B   | 2.936 (3) | O7A | .H12A   | 2.5700    |
| O7C | .C6C   | 2.936 (3) | O7A | .H8A_a  | 2.03 (3)  |
| O7C | .N3B   | 2.791 (2) | O7A | .H13C_c | 2.8800    |
| O9A | .N3B   | 3.248 (3) | O7B | .H8C_k  | 1.99 (3)  |
| O9A | .C5A_e | 3.228 (3) | O7B | .H12C   | 2.8000    |
| O9A | .C6A_d | 3.256 (3) | O7B | .H14B   | 2.5800    |
| O9A | .C2B   | 3.373 (3) | O7B | .H8B    | 2.58 (2)  |
| O9B | .C6B_j | 3.116 (3) | O7B | .H11B_l | 2.4900    |
| O9B | .C5C_m | 3.185 (3) | O7C | .H14B_j | 2.8100    |
| O9C | .C2A_a | 3.406 (3) | O7C | .H8B    | 1.94 (3)  |
| O9C | .C6C_t | 3.224 (3) | O7C | .H8C    | 2.53 (3)  |
| O9C | .C5B_s | 3.167 (3) | O7C | .H12C   | 2.5800    |
| N1A | .C4A   | 2.313 (3) | O7C | .H10C_n | 2.8000    |
| N1B | .C4B   | 2.296 (3) | O9A | .H11A_e | 2.4600    |
| N1C | .C4C   | 2.311 (3) | O9A | .H10A   | 2.7700    |
| N3A | .C5A   | 2.283 (3) | O9A | .H8A    | 2.59 (3)  |
| N3A | .O7A_b | 2.822 (2) | O9A | .H11A   | 2.7400    |
| N3B | .C4A   | 3.449 (3) | O9B | .H8B    | 2.56 (3)  |
| N3B | .O9A   | 3.248 (3) | O9B | .H12B_j | 2.9100    |
| N3B | .O7C   | 2.791 (2) | O9B | .H13B_j | 2.9000    |
| N3B | .C5B   | 2.288 (3) | O9B | .H10A   | 2.6600    |
| N3B | .C4C_n | 3.445 (3) | O9B | .H11B   | 2.7700    |
| N3C | .C5C   | 2.286 (3) | O9B | .H10B   | 2.7300    |

**Table S11** - Contact Distances (Angstrom) (continued)

|     |         |           |     |         |           |
|-----|---------|-----------|-----|---------|-----------|
| O9B | .H10C_m | 2.5900    | C5B | .N3B    | 2.288 (3) |
| O9C | .H11B_s | 2.7400    | C5B | .O9C_p  | 3.167 (3) |
| O9C | .H14C_t | 2.9200    | C5B | .O7B_q  | 3.410 (3) |
| O9C | .H10C   | 2.7700    | C5C | .N3C    | 2.286 (3) |
| O9C | .H8C    | 2.59 (3)  | C5C | .O7A    | 3.353 (3) |
| O9C | .H10B_s | 2.7900    | C5C | .O9B_v  | 3.185 (3) |
| O9C | .H11C   | 2.7600    | C6A | .O9A_i  | 3.256 (3) |
| N1A | .H10B_f | 2.9300    | C6A | .O7A    | 2.927 (3) |
| N1A | .H8A    | 2.95 (2)  | C6B | .O7B    | 2.936 (3) |
| C2A | .C2C    | 3.346 (3) | C6B | .O9B_r  | 3.116 (3) |
| C2A | .O9C_g  | 3.406 (3) | C6B | .C6C_o  | 3.539 (4) |
| C2A | .C4A    | 2.282 (3) | C6C | .O7C    | 2.936 (3) |
| C2B | .O9A    | 3.373 (3) | C6C | .O9C_k  | 3.224 (3) |
| C2B | .C4B    | 2.272 (3) | C6C | .C6B_l  | 3.539 (4) |
| C2C | .C4C    | 2.285 (3) | C2A | .H10A   | 2.9200    |
| C2C | .C2A    | 3.346 (3) | C2A | .H11A   | 2.9700    |
| N3A | .H10A   | 2.9100    | C2A | .H14A   | 3.0500    |
| N3B | .H11B   | 2.9100    | C2A | .H13A   | 3.0900    |
| N3C | .H10C   | 2.9300    | C2A | .H12A   | 2.5400    |
| N3C | .H11C   | 2.9400    | C2B | .H10B   | 2.9600    |
| C4A | .N1A    | 2.313 (3) | C2B | .H13B   | 3.0600    |
| C4A | .N3B    | 3.449 (3) | C2B | .H14C_o | 3.1000    |
| C4B | .N1B    | 2.296 (3) | C2B | .H12B   | 3.0700    |
| C4B | .N3C_n  | 3.443 (3) | C2B | .H14B   | 2.5400    |
| C4C | .N3B_u  | 3.445 (3) | C2B | .H11B   | 2.9200    |
| C4C | .N1C    | 2.311 (3) | C2C | .H13C   | 3.0600    |
| C5A | .N3A    | 2.283 (3) | C2C | .H10C   | 2.9500    |
| C5A | .O9A_h  | 3.228 (3) | C2C | .H11C   | 2.9500    |

**Table S11** - Contact Distances (Angstrom) (continued)

|     |         |          |      |         |          |
|-----|---------|----------|------|---------|----------|
| C2C | .H8B    | 3.05 (3) | H8B  | .O9B    | 2.56 (3) |
| C2C | .H14C   | 3.0900   | H8B  | .O7B    | 2.58 (2) |
| C2C | .H12C   | 2.5500   | H8C  | .O7B_j  | 1.99 (3) |
| C4B | .H10A   | 3.0400   | H8C  | .O9C    | 2.59 (3) |
| C5A | .H13A   | 2.8000   | H8C  | .O7C    | 2.53 (3) |
| C5A | .H8A    | 3.07 (3) | H10A | .O9B    | 2.6600   |
| C5A | .H10B_f | 3.0200   | H10A | .O9A    | 2.7700   |
| C5A | .H14A   | 2.7700   | H10A | .C4B    | 3.0400   |
| C5B | .H13B   | 2.8100   | H10A | .N3A    | 2.9100   |
| C5B | .H12B   | 2.7500   | H10A | .C6A    | 2.8100   |
| C5C | .H14C   | 2.7700   | H10A | .C2A    | 2.9200   |
| C5C | .H13C   | 2.7700   | H10B | .C2B    | 2.9600   |
| C6A | .H10A   | 2.8100   | H10B | .H11A_e | 2.4400   |
| C6A | .H11A   | 2.8300   | H10B | .C5A_e  | 3.0200   |
| C6B | .H14A_d | 3.0700   | H10B | .O9C_p  | 2.7900   |
| C6B | .H10B   | 2.8200   | H10B | .O9B    | 2.7300   |
| C6B | .H14C_o | 3.0600   | H10B | .N1A_e  | 2.9300   |
| C6B | .H11B   | 2.8200   | H10B | .C6B    | 2.8200   |
| C6C | .H11C   | 2.7900   | H10C | .C2C    | 2.9500   |
| C6C | .H10C   | 2.8300   | H10C | .C6C    | 2.8300   |
| C6C | .H12B_l | 3.0500   | H10C | .N3C    | 2.9300   |
| H8A | .O9A    | 2.59 (3) | H10C | .O9B_v  | 2.5900   |
| H8A | .O7A    | 2.50 (2) | H10C | .O9C    | 2.7700   |
| H8A | .N1A    | 2.95 (2) | H10C | .O7C_w  | 2.8000   |
| H8A | .C5A    | 3.07 (3) | H11A | .H10B_f | 2.4400   |
| H8A | .O7A_b  | 2.03 (3) | H11A | .C6A    | 2.8300   |
| H8B | .C2C    | 3.05 (3) | H11A | .O9A    | 2.7400   |
| H8B | .O7C    | 1.94 (3) | H11A | .C2A    | 2.9700   |

**Table S11** - Contact Distances (Angstrom) (continued)

|      |        |        |      |        |        |
|------|--------|--------|------|--------|--------|
| H11A | .O9A_h | 2.4600 | H12C | .O7C   | 2.5800 |
| H11B | .C6B   | 2.8200 | H13A | .C2A   | 3.0900 |
| H11B | .O9B   | 2.7700 | H13A | .C5A   | 2.8000 |
| H11B | .C2B   | 2.9200 | H13B | .C5B   | 2.8100 |
| H11B | .O9C_p | 2.7400 | H13B | .C2B   | 3.0600 |
| H11B | .N3B   | 2.9100 | H13B | .O9B_r | 2.9000 |
| H11B | .O7B_q | 2.4900 | H13C | .O7A_b | 2.8800 |
| H11C | .N3C   | 2.9400 | H13C | .C5C   | 2.7700 |
| H11C | .O7A   | 2.8500 | H13C | .C2C   | 3.0600 |
| H11C | .O9C   | 2.7600 | H14A | .C2A   | 3.0500 |
| H11C | .C2C   | 2.9500 | H14A | .C5A   | 2.7700 |
| H11C | .C6C   | 2.7900 | H14A | .C6B_j | 3.0700 |
| H12A | .O7A   | 2.5700 | H14B | .O7B   | 2.5800 |
| H12A | .O7A_a | 2.6100 | H14B | .O7C_k | 2.8100 |
| H12A | .C2A   | 2.5400 | H14B | .C2B   | 2.5400 |
| H12B | .C5B   | 2.7500 | H14C | .O9C_k | 2.9200 |
| H12B | .C2B   | 3.0700 | H14C | .C2C   | 3.0900 |
| H12B | .C6C_o | 3.0500 | H14C | .C5C   | 2.7700 |
| H12B | .O9B_r | 2.9100 | H14C | .C2B_l | 3.1000 |
| H12C | .C2C   | 2.5500 | H14C | .C6B_l | 3.0600 |
| H12C | .O7B   | 2.8000 |      |        |        |

**Table S12** - Hydrogen Bonds (Angstrom, Deg)

|     |    |      |    |     |         |         |          |        |       |
|-----|----|------|----|-----|---------|---------|----------|--------|-------|
| N3A | -- | H8A  | .. | O7A | 0.80(3) | 2.03(3) | 2.822(2) | 172(3) | 3_456 |
| N3B | -- | H8B  | .. | O7C | 0.86(3) | 1.94(3) | 2.791(2) | 171(2) | .     |
| N3C | -- | H8C  | .. | O7B | 0.84(3) | 1.99(3) | 2.828(2) | 176(3) | 1_655 |
| C5C | -- | H10C | .. | O9B | 0.9700  | 2.5900  | 3.185(3) | 120.00 | 1_545 |
| C5A | -- | H11A | .. | O9A | 0.9700  | 2.4600  | 3.228(3) | 136.00 | 3_566 |
| C5B | -- | H11B | .. | O7B | 0.9700  | 2.4900  | 3.410(3) | 158.00 | 4_555 |
| C6A | -- | H12A | .. | O7A | 0.9600  | 2.5700  | 2.927(3) | 102.00 | .     |
| C6C | -- | H12C | .. | O7C | 0.9600  | 2.5800  | 2.936(3) | 102.00 | .     |
| C6B | -- | H14B | .. | O7B | 0.9600  | 2.5800  | 2.936(3) | 102.00 | .     |

Translation of Symmetry Code to Equiv. Pos

a = [ 3556.00] = [ 4\_556] =  $1/2+x, 1/2-y, 1-z$   
b = [ 3456.00] = [ 4\_456] =  $-1/2+x, 1/2-y, 1-z$   
c = [ 3556.00] = [ 4\_556] =  $1/2+x, 1/2-y, 1-z$   
d = [ 1455.00] = [ 1\_455] =  $-1+x, y, z$   
e = [ 3466.00] = [ 4\_466] =  $-1/2+x, 3/2-y, 1-z$   
f = [ 3566.00] = [ 4\_566] =  $1/2+x, 3/2-y, 1-z$   
h = [ 3566.00] = [ 4\_566] =  $1/2+x, 3/2-y, 1-z$   
i = [ 1655.00] = [ 1\_655] =  $1+x, y, z$   
j = [ 1655.00] = [ 1\_655] =  $1+x, y, z$   
k = [ 1455.00] = [ 1\_455] =  $-1+x, y, z$   
l = [ 4545.00] = [ 3\_545] =  $-x, -1/2+y, 1/2-z$   
m = [ 1565.00] = [ 1\_565] =  $x, 1+y, z$   
n = [ 4655.00] = [ 3\_655] =  $1-x, 1/2+y, 1/2-z$   
o = [ 4555.00] = [ 3\_555] =  $-x, 1/2+y, 1/2-z$   
p = [ 1465.00] = [ 1\_465] =  $-1+x, 1+y, z$   
q = [ 4555.00] = [ 3\_555] =  $-x, 1/2+y, 1/2-z$   
r = [ 1455.00] = [ 1\_455] =  $-1+x, y, z$   
s = [ 1645.00] = [ 1\_645] =  $1+x, -1+y, z$   
u = [ 4645.00] = [ 3\_645] =  $1-x, -1/2+y, 1/2-z$   
v = [ 1545.00] = [ 1\_545] =  $x, -1+y, z$   
w = [ 4645.00] = [ 3\_645] =  $1-x, -1/2+y, 1/2-z$
